# Supplementary material for: An experimental and computational look at the radiolytic degradation of TODGA and the effect on metal complexation
Source: Royal Society of Chemistry journal article supplement (doi:10.1039/d1nj01143j), 2021-01-01
Supplement: d1nj01143j1.pdf [file d1nj01143j1.pdf]

## An Experimental and Computational Look at the Radiolytic Degradation of TODGA and the Effect on Metal Complexation

Ashleigh Kimberlin<sup>a</sup>, Dominique Guillaumont<sup>a</sup>, Sylvie Arpigny<sup>a</sup>, Béatrice Camès<sup>a</sup>, Philippe Guilbaud<sup>a</sup>, Georges Saint-Louis<sup>a</sup>, Hitos Galán<sup>b</sup>, and Laurence Berthon<sup>\*a</sup>

### Supplemental

Table S1: Complete list of peaks found in ESI-MS spectra. Some peaks remain unassigned. The numbers refer to the solution conditions detailed in Table 1. The conditions are also listed under the name where octOH = 5 %<sub>vol</sub> 1-octanol, x mol L<sup>-1</sup> HNO<sub>3</sub> = concentration of HNO<sub>3</sub> in the precontact, even numbers being irradiated to approx. 250 kGy and odd numbers being irradiated to approx. 500 kGy. Nd refers to if the product has appeared in an ion peak with Nd<sup>3+</sup>. References are literature sources in which the degradation product has previously been identified as a radiolysis product of DGA. Main degradation products and degradation products found in Nd molecular ion peaks have been given a DP number.

| DP  | Proposed Structure                                                                  | LH <sup>+</sup><br>m/z | LNa <sup>+</sup><br>m/z | 0 | 1/2 | 3/4<br>OctOH | 5/6<br>1 mol L <sup>-1</sup> HNO <sub>3</sub> | 7/8<br>octOH 1 mol L <sup>-1</sup> | 9/10<br>OctOH 2.5 mol L <sup>-1</sup> | Nd | Comments                                             | Ref. |
|-----|-------------------------------------------------------------------------------------|------------------------|-------------------------|---|-----|--------------|-----------------------------------------------|------------------------------------|---------------------------------------|----|------------------------------------------------------|------|
| I   | 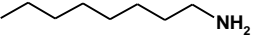 | 130                    | 152                     |   | *   | *            | *                                             | *                                  | *                                     |    | High instrument response factor                      |      |
| II  |  | 157                    | 179                     |   | *   | *            | *                                             | *                                  | *                                     |    |                                                      |      |
|     |                                                                                     | 194                    |                         |   |     |              | *                                             | *                                  | *                                     |    |                                                      |      |
|     |                                                                                     | 200                    |                         |   |     |              |                                               |                                    | *                                     |    |                                                      |      |
|     |                                                                                     | 210                    |                         |   |     |              | *                                             | *                                  | *                                     |    |                                                      |      |
|     |                                                                                     | 240                    |                         |   | *   | *            |                                               |                                    | *                                     |    |                                                      |      |
| III |  | 242                    | 264                     | * | *   | *            | *                                             | *                                  | *                                     |    | High instrument response factor                      | 1-7  |
|     |                                                                                     | 255                    |                         |   |     |              | *                                             |                                    | *                                     |    |                                                      |      |
| IV  |  | 256                    | 278                     |   |     |              | *                                             | *                                  | *                                     |    | Oxygen location debatable<br>Only visible at 250 kGy | 2    |
|     |                                                                                     | 267                    | 289                     |   | *   | *            | *                                             | *                                  | *                                     |    |                                                      |      |
| V   |  | 270                    | 292                     |   | *   | *            | *                                             | *                                  | *                                     |    |                                                      | 1-8  |

|      |  |     |     |   |   |   |   |   |   |   |                                                                             |           |
|------|--|-----|-----|---|---|---|---|---|---|---|-----------------------------------------------------------------------------|-----------|
| VI   |  | 284 | 306 |   | * | * | * | * | * |   |                                                                             | 1-8       |
| VII  |  | 300 | 322 |   | * | * | * | * | * |   | May complex metal in solution, see discussion                               | 1-8       |
|      |  | 312 | 334 | * | * | * | * | * | * |   | location of double bond unknown                                             |           |
| VIII |  | 314 | 336 | * | * | * | * | * | * |   | Results from radiolytic split                                               | 1, 8      |
|      |  | 320 |     |   |   |   | * | * | * |   |                                                                             |           |
|      |  | 338 |     |   |   |   | * | * | * |   |                                                                             |           |
|      |  | 340 |     |   | * |   |   |   |   |   |                                                                             |           |
| IX   |  | 358 | 380 |   |   |   | * | * |   | X | Mostly seen as Na <sup>+</sup> adduct, see Figure 4 for formation mechanism | 1, 3, 5-8 |
|      |  | 368 |     |   | * | * |   |   | * |   |                                                                             |           |
|      |  | 379 |     |   |   |   | * | * | * |   |                                                                             |           |
|      |  | 468 | 490 |   | * | * |   |   |   |   |                                                                             |           |
| X    |  | 469 | 491 | * | * | * | * | * | * | X | LK <sup>+</sup> : 507                                                       | 3-6, 8    |
| XI   |  | 470 | 492 | * |   | * |   |   | * | X | LK <sup>+</sup> : 508<br>See Figure 4 for formation mechanism               | 3         |
|      |  | 550 | 572 |   | * | * | * | * | * |   |                                                                             |           |
|      |  | 555 |     |   | * | * | * |   |   |   |                                                                             |           |
|      |  | 567 | 589 | * | * | * | * | * | * |   |                                                                             |           |
|      |  | 581 | 603 | * | * | * | * | * | * |   | LK <sup>+</sup> : 619                                                       |           |
| XII  |  | 595 | 617 |   | * | * | * | * | * | X | LK <sup>+</sup> : 633                                                       |           |
|      |  | 654 |     |   |   |   | * | * | * |   |                                                                             |           |
|      |  | 710 |     |   | * | * | * | * | * |   |                                                                             |           |
| XIII |  | 751 | 773 |   |   |   |   |   |   | X | Only seen in Nd complexes, dodecyl location variable                        |           |

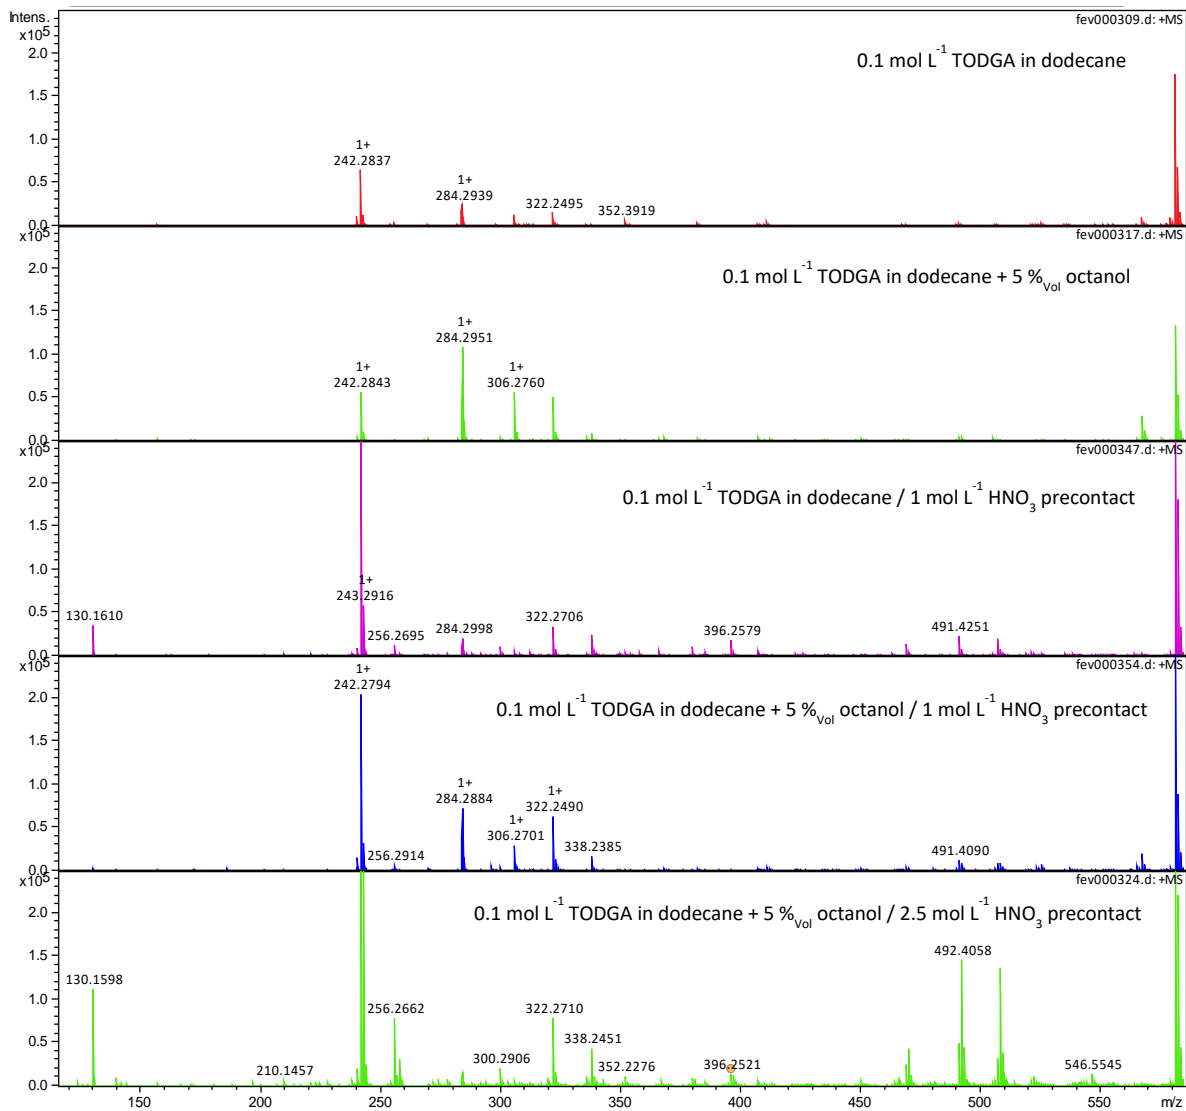

Figure S1: ESI-MS of TODGA solutions irradiated to 250 kGy after dilution in 1/10000<sup>th</sup> in acetonitrile.

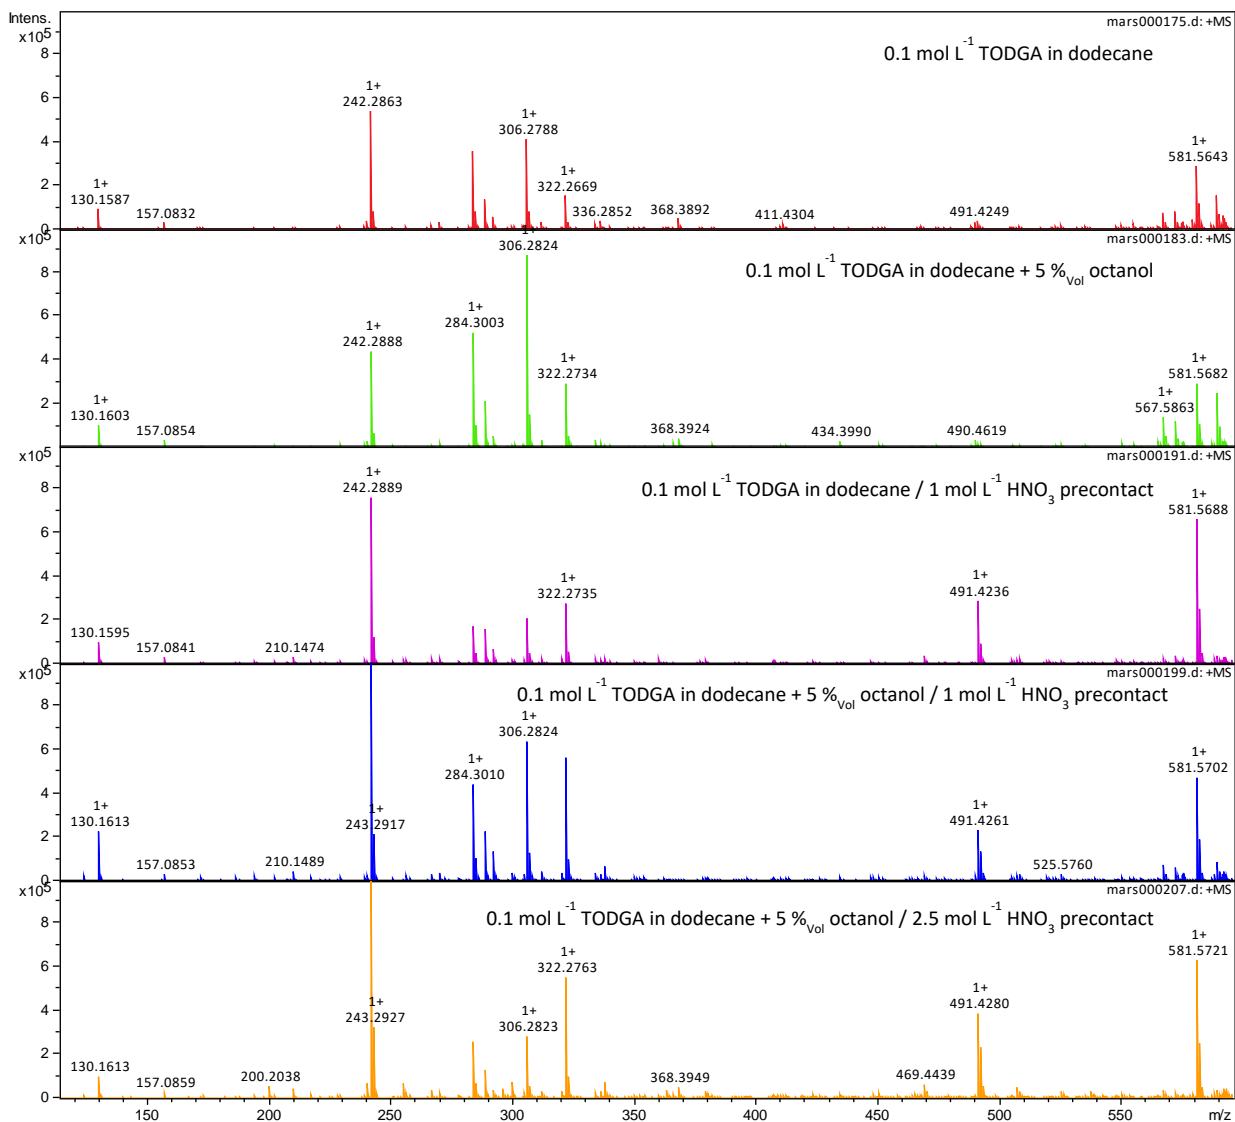

Figure S2: ESI-MS of TODGA solution irradiated to 500 kGy after dilution in 1/10000<sup>th</sup> in acetonitrile

| Bond                                | Dissociation Energy (eV) |
|-------------------------------------|--------------------------|
| N <sub>amide</sub> -C <sub>1</sub>  | 3.81                     |
| C <sub>1</sub> -C <sub>2</sub>      | 3.61                     |
| C <sub>2</sub> -C <sub>3</sub>      | 3.89                     |
| C <sub>3</sub> -C <sub>4</sub>      | 3.82                     |
| C <sub>4</sub> -C <sub>5</sub>      | 3.82                     |
| C <sub>5</sub> -C <sub>6</sub>      | 3.86                     |
| N <sub>amide</sub> -C <sub>9</sub>  | 3.96                     |
| C <sub>9</sub> -C <sub>10</sub>     | 3.34                     |
| C <sub>10</sub> -O <sub>ether</sub> | 3.31                     |
| C <sub>10</sub> -H <sub>9</sub>     | 3.64                     |
| C <sub>5</sub> -H <sub>5</sub>      | 4.29                     |
| C <sub>4</sub> -H <sub>4</sub>      | 4.25                     |
| C <sub>3</sub> -H <sub>3</sub>      | 4.28                     |
| C <sub>2</sub> -H <sub>2</sub>      | 4.30                     |
| C <sub>1</sub> -H <sub>1</sub>      | 4.00                     |

Figure S3: Schematic representation of molecule used in TODGA and bond dissociation energy calculations.

Bond dissociation energies of TODGA were calculated using Gaussian 16. The energies of the two fragments formed by the homolytic cleavage of bond were calculated using the G3MP2 method. The difference in total energy of the fragments and the whole molecule is the bond dissociation energy. To reduce computation time, the bond dissociation energies for TEDGA were calculated for the center of the molecule, three of the octyl chains in TODGA were replaced with ethyl chains when calculating the alkyl C-C bond dissociation energies, and the alpha-hydroxyamide half of TODGA was used for the calculation of C-H bonds in the alkyl chains.

The weakest bond in the molecule is between the etheric C and O. The amide C-N bond is the strongest, therefore least likely to be broken by direct excitation, i.e. being attacked by a dodecane radical. The alkyl chains, for the most part, have the same high energy, making fragmentation of the alkyl chain more unlikely than fragmentation closer to the polar center of the molecule. The bond between the first (C<sub>1</sub>) and second (C<sub>2</sub>) carbons on the alkyl chain seems unusually weak, considering that the adjacent amide would strengthen the C<sub>1</sub>-N bond, but not weaken the next bond. This result is due to the computational method used, as each fragment made by the homolytic cleavage of the bond is calculated separately. The fragment containing the amide is stabilized due to the presence of a partial double bond ( $\bullet\text{CH}_2\approx\text{N}-\text{C}=\text{O}$ ), which causes the overall energy of that fragment to decrease.

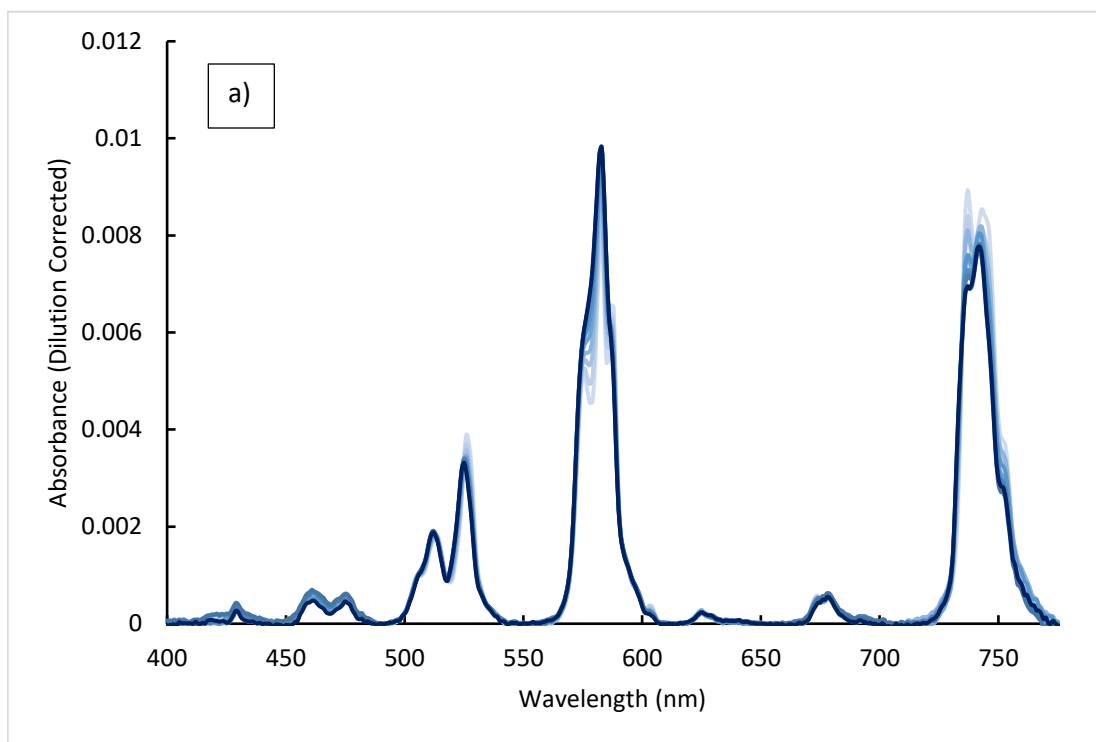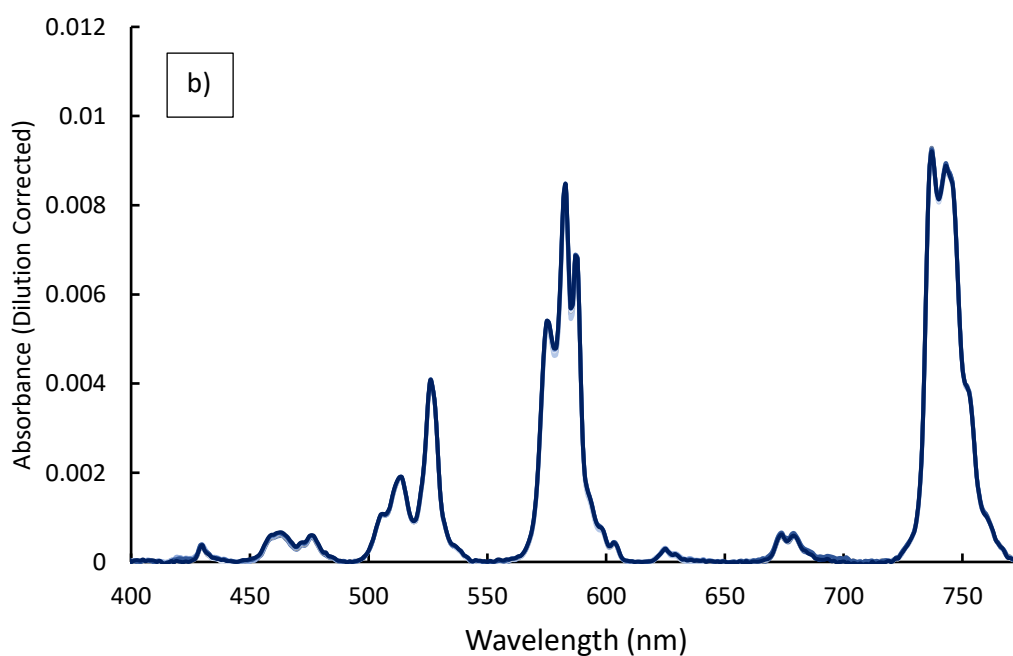

Figure S4: UV-Vis spectra of Nd-TODGA solutions in n-dodecane + 5 %<sub>vol</sub> 1-octanol with either DPVII (a) or DPIX (b). In the top, the color progresses from light to dark as DPVII is added. Initial solution: 0.1 mol L<sup>-1</sup> TODGA in dodecane + 5 %<sub>vol</sub> 1-octanol solution containing 18 mmol L<sup>-1</sup> Nd. Progressive addition of 0.1 mL of 0.1 mol L<sup>-1</sup> DPVII (top) or DPIX (bottom) in 0.1 mol L<sup>-1</sup> TODGA solution until a 1:1 mol ratio of TODGA to the degradation product was reached. Final concentration 0.05 mol L<sup>-1</sup> TODGA + 0.05 mol L<sup>-1</sup> DPVII (top) or DPIX (bottom) 9 mmol L<sup>-1</sup> Nd in dodecane+ 5 %<sub>vol</sub> 1-octanol.

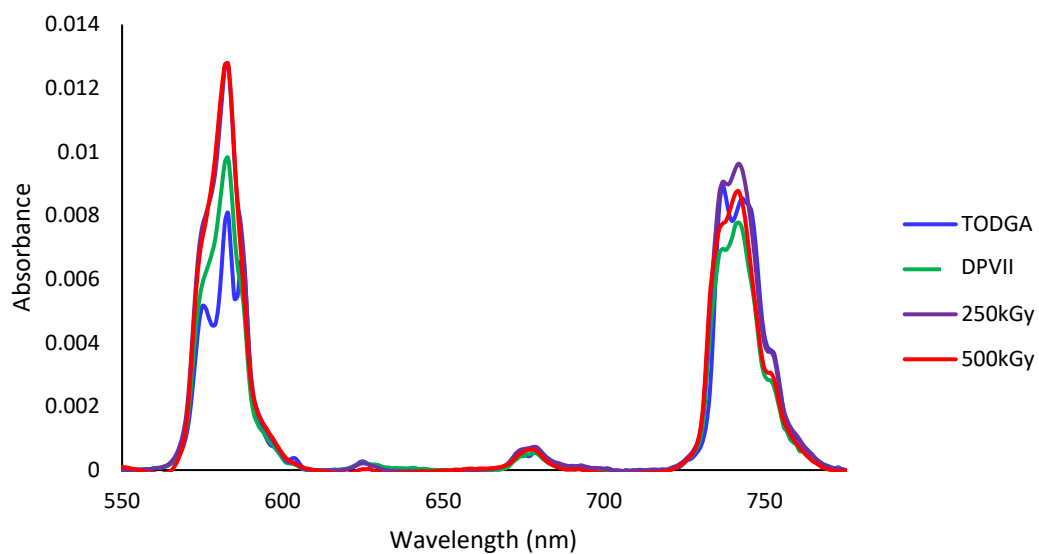

Figure S5. UV-Vis spectra comparing the Nd<sup>3+</sup> spectra of irradiated TODGA solutions to the final titration of DPVII into a 0.1 mol L<sup>-1</sup> TODGA in dodecane + 5 %<sub>vol</sub> 1-octanol solution containing 15 mmol L<sup>-1</sup> Nd. Ratio of TODGA to DPVII is 1:1. Spectra have been concentration / dilution corrected.

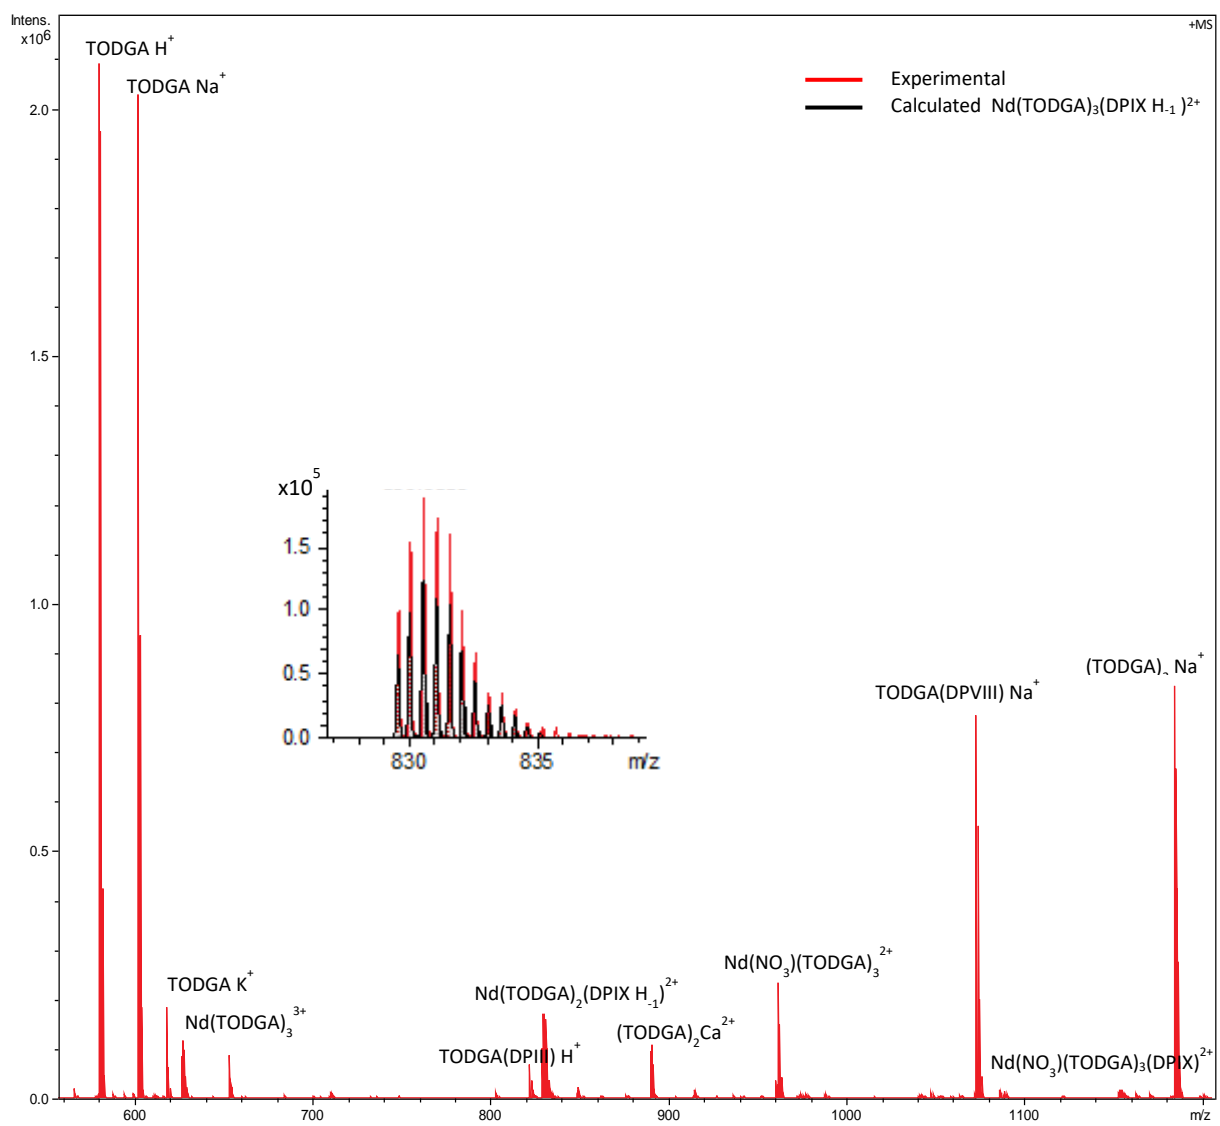

Figure S6: ESI-MS of the final titration solution of DPIX into Nd-TODGA in n-dodecane. The insert the largest peak containing DPIX and Nd. This peak only fits when DPIX is deprotonated.



## References

1. Y. Sugo, Y. Sasaki and S. Tachimori, *Radiochimica Acta*, 2002, **90**, 161-165.
2. H. Galan, C. A. Zarzana, A. Wilden, A. Nunez, H. Schmidt, R. J. M. Egberink, A. Leoncini, J. Cobos, W. Verboom, G. Modolo, G. S. Groenewold and B. J. Mincher, *Dalton Transactions*, 2015, **44**, 18049-18056.
3. H. Galan, A. Nunez, A. G. Espartero, R. Sedano, A. Durana and J. de Mendoza, *Procedia Chemistry*, 2012, **7**, 195-201.
4. V. Hubscher-Bruder, V. Mogilireddy, S. Michel, A. Leoncini, J. Huskens, W. Verboom, H. Galan, A. Nunez, J. Cobos, G. Modolo, A. Wilden, H. Schmidt, M. C. Charbonnel, P. Guilbaud and N. Boubals, *New Journal of Chemistry*, 2017, **41**, 13700-13711.
5. K. M. Roscioli-Johnson, C. A. Zarzana, G. S. Groenewold, B. J. Mincher, A. Wilden, H. Schmidt, G. Modolo and B. Santiago-Schübel, *Solvent Extraction and Ion Exchange*, 2016, **34**, 439-453.
6. I. Sánchez-García, H. Galán, J. M. Perlado and J. Cobos, *EPJ Nuclear Sci. Technol.*, 2019, **5**, 19.
7. J. N. Sharma, R. Ruhela, K. K. Singh, M. Kumar, C. Janardhanan, P. V. Achutan, S. Manohar, P. K. Wattal and A. K. Suri, *Radiochimica Acta*, 2010, **98**, 485-491.
8. C. A. Zarzana, G. S. Groenewold, B. J. Mincher, S. P. Mezyk, A. Wilden, H. Schmidt, G. Modolo, J. F. Wishart and A. R. Cook, *Solvent Extraction and Ion Exchange*, 2015, **33**, 431-447.
